# Supplementary material for: Fast determination of five chiral antipsychotic drugs using dispersive liquid–liquid microextraction combined with capillary electrophoresis
Source: Royal Society of Chemistry journal article supplement (doi:10.1039/c9ay02776a), 2020-01-01
Supplement: c9ay02776a1.pdf [file c9ay02776a1.pdf]

## Supporting information

### Fast determination of five chiral antipsychotic drugs using dispersive liquid– liquid microextraction combined with capillary electrophoresis

Ming-Mu Hsieh,<sup>\*a</sup> Tai-Chia Chiu<sup>\*b</sup> and Szu-Hua, Chen<sup>a</sup>

<sup>a</sup> Department of Chemistry, National Kaohsiung Normal University, Taiwan

<sup>b</sup> Department of Applied Science, National Taitung University, Taitung, Taiwan

#### Correspondence:

Ming-Mu Hsieh,

Department of Chemistry, National Kaohsiung Normal University, No.62, Shengzhong Rd., Yanchao District, Kaohsiung City 82446, Taiwan (R.O.C.)

Tel: (011)-886-7-717-2930-7162

Fax: (011)-886-7-6051083

E-mail: [t3644@nknucc.nknu.edu.tw](mailto:t3644@nknucc.nknu.edu.tw)

Tai-Chia Chiu,

Department of Applied Science, National Taitung University, 369, Section 2, University Road, Taitung 95092, Taiwan

Tel.: 886-89-517990

Fax: 886-89-518108

E-mail: [tcchiu@nttu.edu.tw](mailto:tcchiu@nttu.edu.tw)

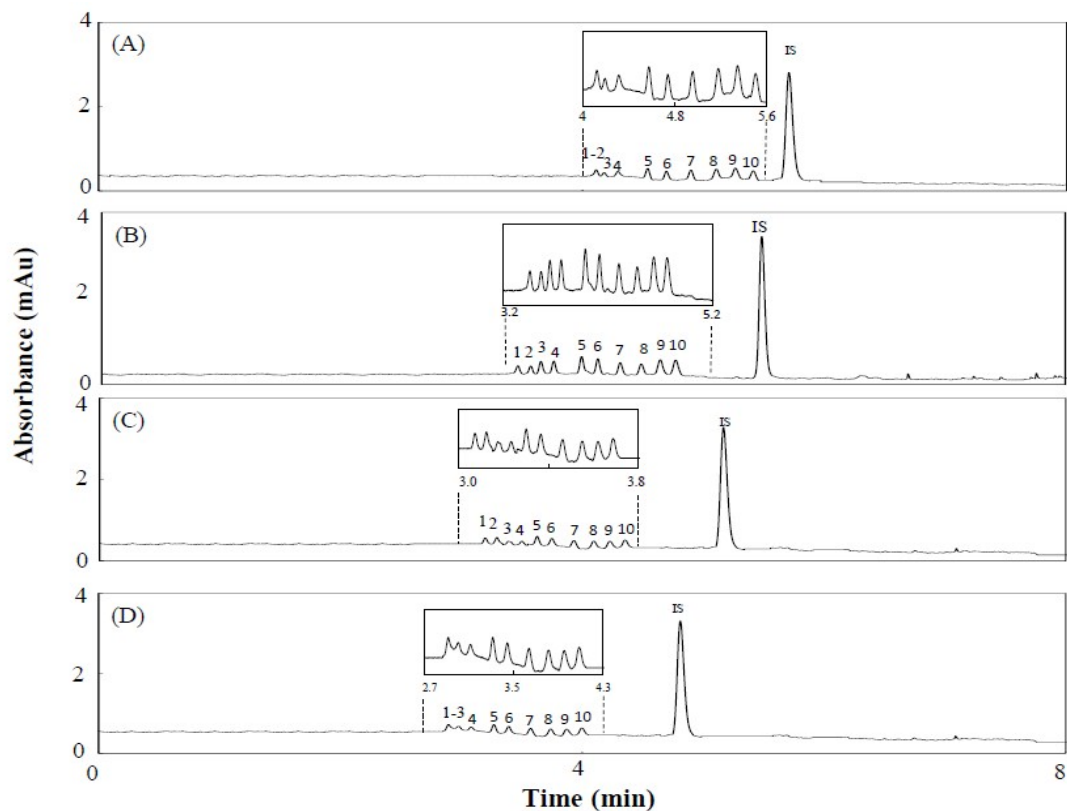

**Fig. S1** Effect of pH on the CE enantioseparation of 5 pairs of D,L-phenothiazines. pH: (A) 2.5, (B) 3.0, (C) 3.5, and (D) 4.0. Electrophoresis conditions: separation buffer, 150 mM formic acid, 0.9% PDDAC and 5 mM Hp- $\gamma$ -CD; applied voltage, -8.5 kV; hydrodynamic injection at 20-cm height for 10 s; and UV detection at 254 nm. Peak identities (5  $\mu$ M): 1. D-Thi, 2. L-Thi, 3. D-Met, 4. L-Met, 5. D-Tri, 6. L-Tri, 7. D-Eth, 8. L-Eth, 9. D-Pro, 10. L-Pro.

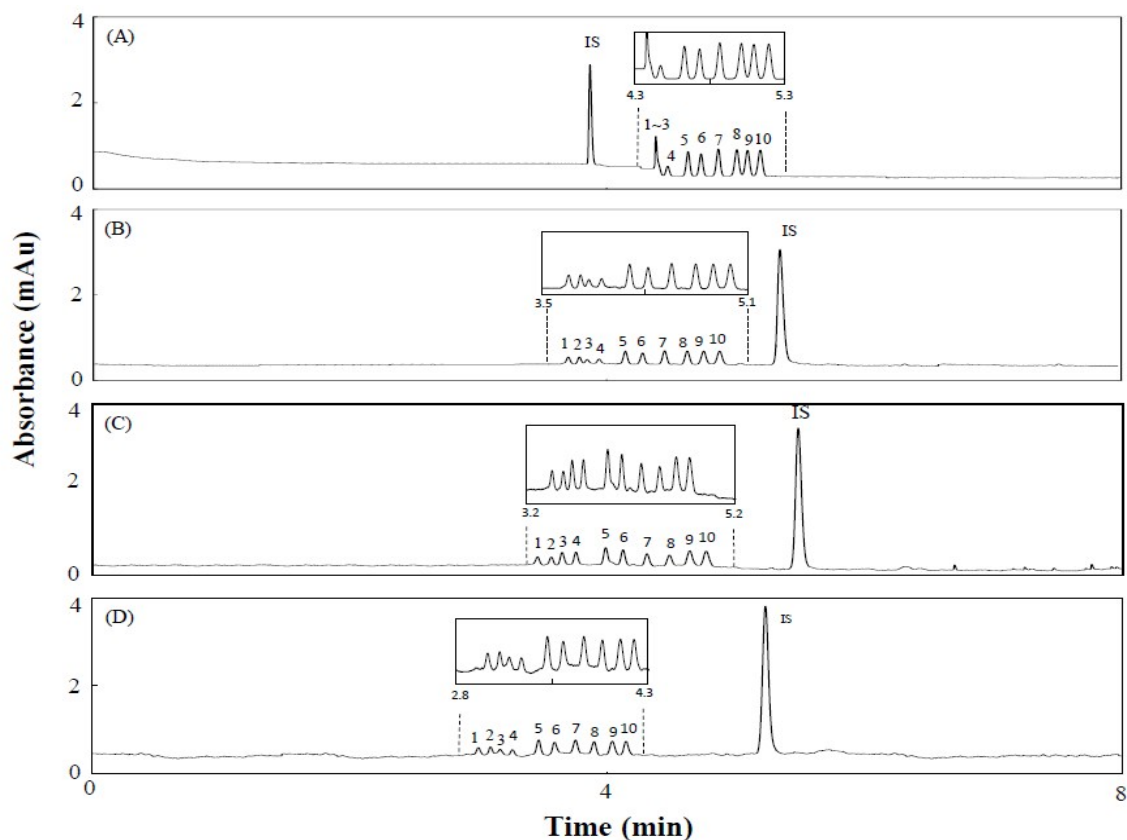

**Fig. S2** Effect of PDDAC concentration on the CE separation of 5 pairs of DL-phenothiazines: (A) 0, (B) 0.6, (C) 0.6, and (D) 1.2% PDDAC into the background electrolyte. Electrophoresis conditions: 33 cm capillary (23 cm to detector); separation buffer, 150 mM formic acid (pH 3.0), and 5 mM HP- $\gamma$ -CD; applied voltage, -8.5 kV; hydrodynamic injection at 20-cm height for 10 s; and UV detection at 254 nm. Peak identities (5  $\mu$ M): 1. D-Thi, 2. L-Thi, 3. D-Met, 4. L-Met, 5. D-Tri, 6. L-Tri, 7. D-Eth, 8. L-Eth, 9. D-Pro, 10. L-Pro.

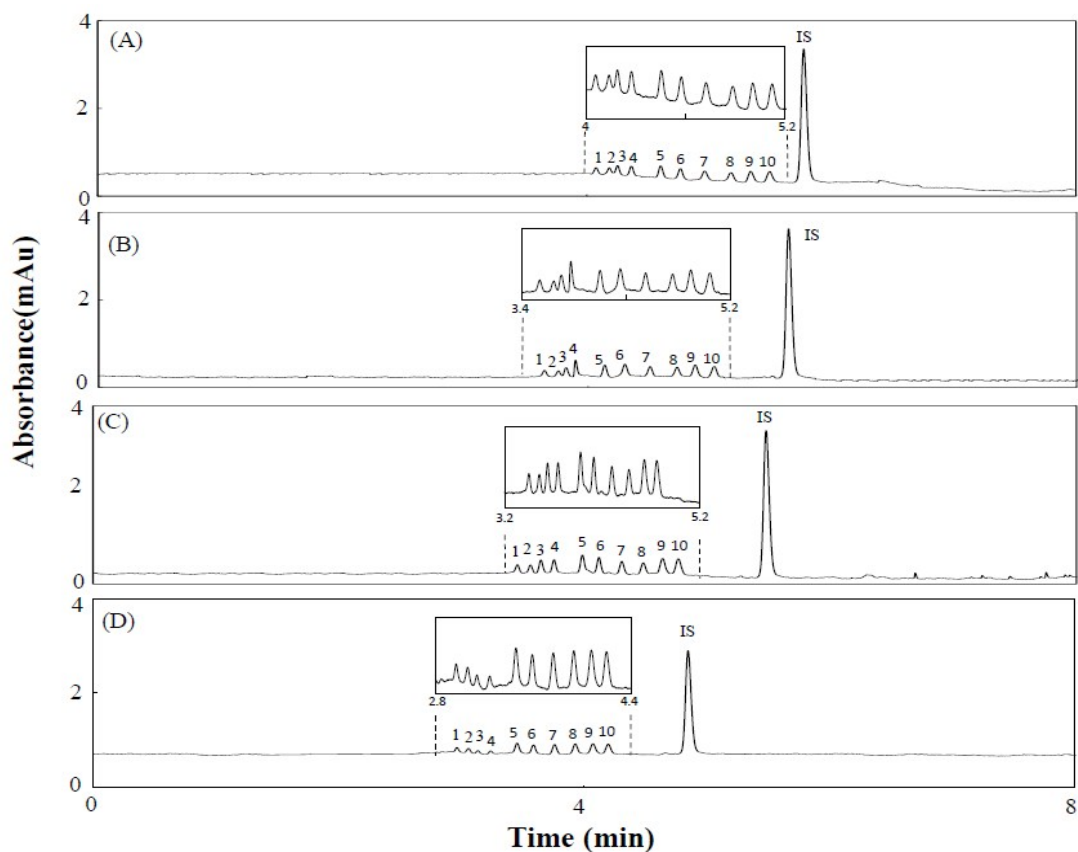

**Fig. S3** Effect of the background electrolyte concentrations on CE separation of 5 pairs of DL-phenothiazines: (A) 50, (B) 100, (C) 150, and (D) 200 mM formic acid (pH 3.0) containing 0.9% PDDAC. Electrophoresis conditions: 33 cm capillary (23 cm to detector); applied voltage, -8.5 kV; hydrodynamic injection at 20-cm height for 10 s; and UV detection at 254 nm. Peak identities (5  $\mu$ M): 1. D-Thi, 2. L-Thi, 3. D-Met, 4. L-Met, 5. D-Tri, 6. L-Tri, 7. D-Eth, 8. L-Eth, 9. D-Pro, 10. L-Pro.

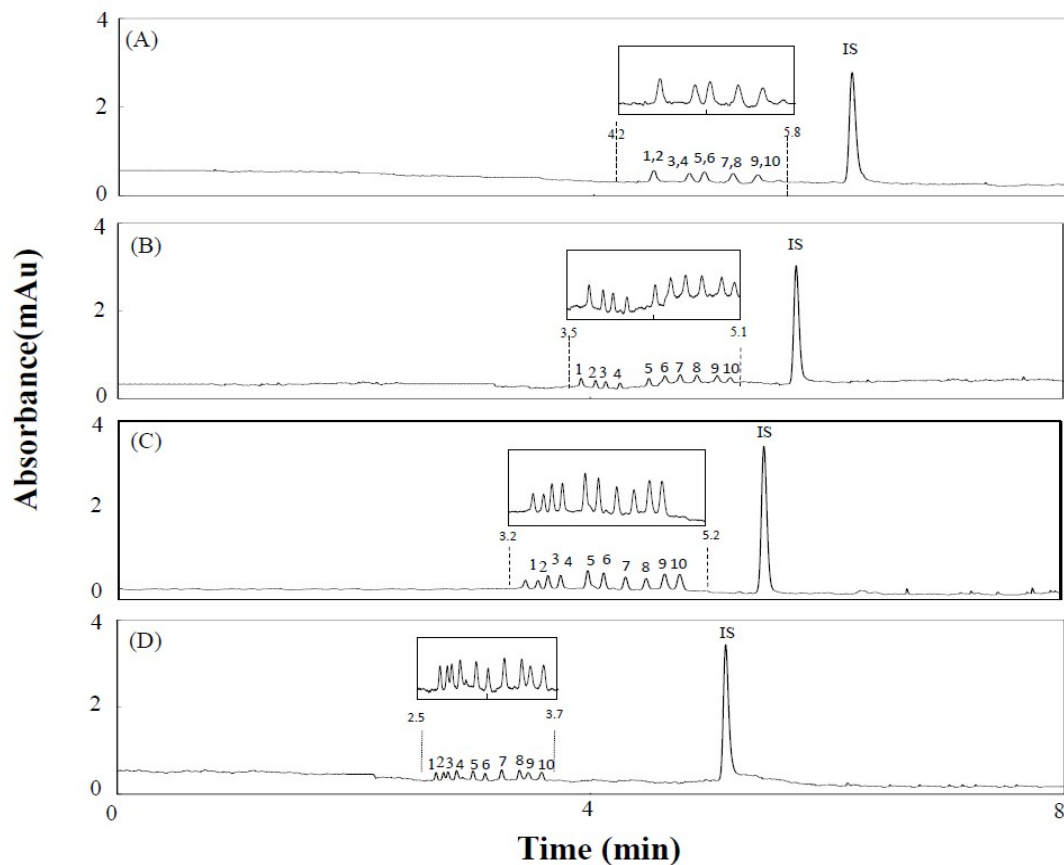

**Fig. S4** Effect of the concentration of Hp- $\gamma$ -CD on the CE enantioseparation of 5 pairs of DL-phenothiazines: (A) 0, (B) 2.5, (C) 5.0, and (D) 7.5 mM HP- $\gamma$ -CD. 33 cm capillary (23 cm to detector); separation buffer, 150 mM formic acid (pH 3.0), 0.9% PDDAC and Hp- $\gamma$ -CD; applied voltage, -8.5 kV; hydrodynamic injection at 20-cm height for 10 s; and UV detection at 254 nm. Peak identities (5  $\mu$ M): 1. D-Thi, 2. L-Thi, 3. D-Met, 4. L-Met, 5. D-Tri, 6. L-Tri, 7. D-Eth, 8. L-Eth, 9. D-Pro, 10. L-Pro.

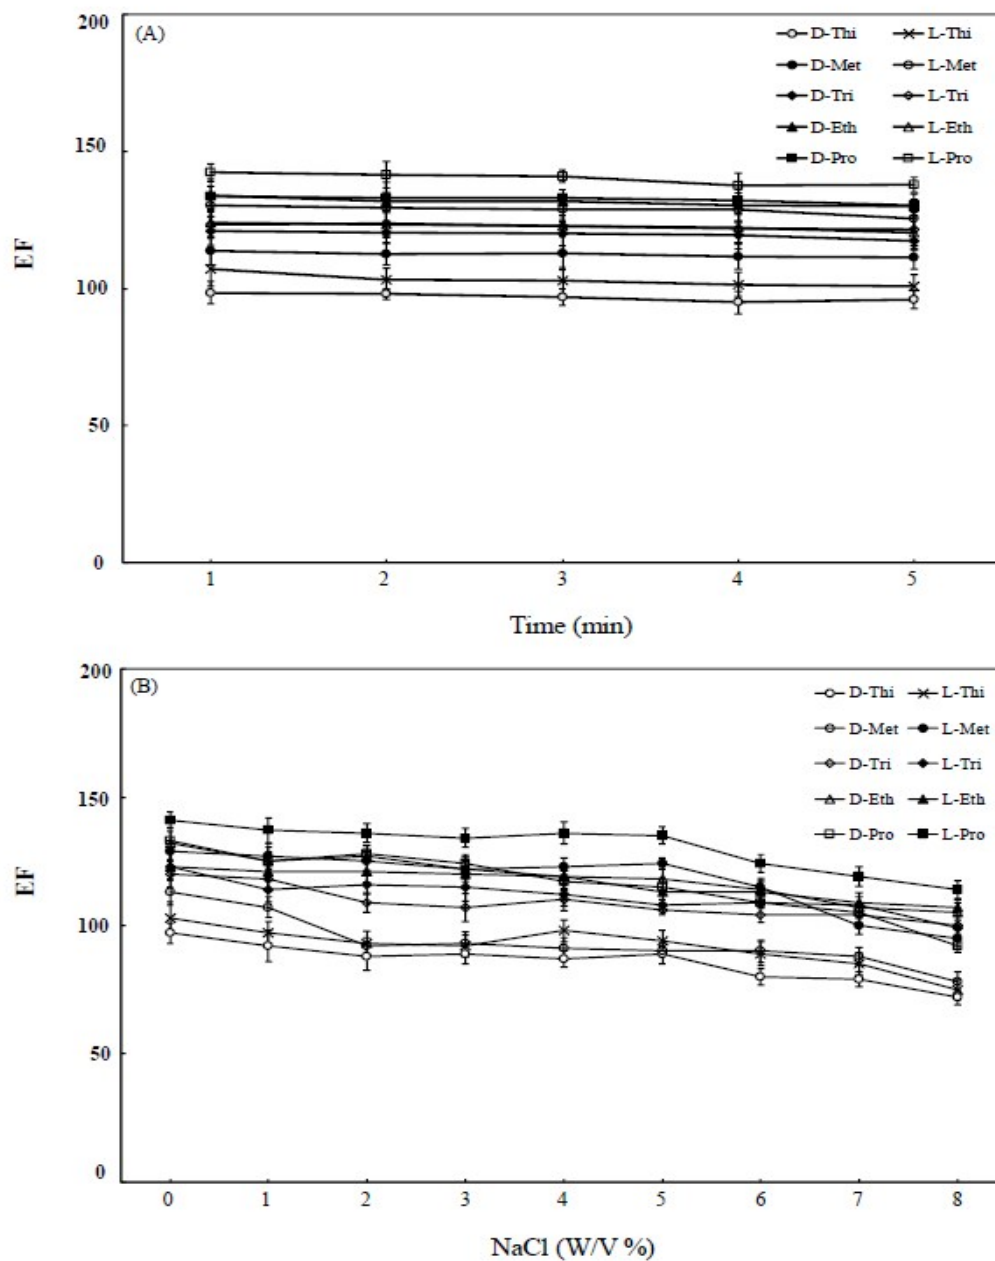

**Fig. S5** Effect of experimental parameters on extraction efficiency of UA-DLLME:

(A) extraction time and (B) NaCl concentration. Extraction conditions: 200  $\mu\text{L}$  of THF dispersive solvent containing 30  $\mu\text{L}$   $\text{CHCl}_3$  extraction solvent was rapidly injected into 1 mL of sample solution (pH 10). (A) Without NaCl and (B) with NaCl concentrations from 0 to 8% (w/v); extraction time (A) from 1 to 5 min ; and (B) at 1 min.
